# Supplementary material
Source: PubMed Central journal article supplement (PMC151388)
Supplement: pnas_0337679100_1.pdf [file pnas_0337679100_1.pdf]

Supporting information for Baechler *et al.* (2003) *Proc. Natl. Acad. Sci. USA*,  
10.1073/pnas.0337679100

**Table 1. IFN score and clinical data for 48 SLE patients**



| Sample | IFN score | Age at diagnosis | # of SLE criteria | Renal | CNS | Hematologic | Serositis | anti-dsDNA | Medication                                    |
|--------|-----------|------------------|-------------------|-------|-----|-------------|-----------|------------|-----------------------------------------------|
| SLE 1  | 1.22      | 28               | 5                 | -     | -   | -           | +         | -          | --                                            |
| SLE 2  | 5.87      | 15               | 6                 | +     | -   | +           | -         | +          | --                                            |
| SLE 3  | 8.45      | 13               | 9                 | +     | -   | +           | -         | +          | Plaq (400mg/d), Pred (7mg/d)                  |
| SLE 4  | 1.49      | 28               | 4                 | -     | -   | -           | +         | -          | Plaq (400mg/d)                                |
| SLE 5  | 2.58      | 26               | 5                 | +     | -   | -           | +         | +          | Pred                                          |
| SLE 6  | 3.11      | 18               | 5                 | +     | -   | +           | -         | -          | Pred (10mg/qod)                               |
| SLE 7  | 2.12      | 21               | 7                 | -     | -   | -           | +         | +          | Plaq (400mg/d)                                |
| SLE 8  | 1.63      | 32               | 4                 | -     | -   | -           | -         | +          | Pred (11mg/d), Imuran (150mg/d)               |
| SLE 9  | 1.73      | 15               | 5                 | -     | -   | +           | -         | +          | Plaq (400mg/d), Pred (3mg/d)                  |
| SLE 10 | 3.29      | 13               | 6                 | -     | -   | -           | +         | -          | Pred (15mg/d)                                 |
| SLE 11 | 1.93      | 48               | 7                 | -     | -   | +           | +         | -          | Plaq (200mg/d), Pred (14mg/d)                 |
| SLE 12 | 5.00      | 30               | 8                 | +     | -   | +           | +         | +          | Pred (5mg/qod)                                |
| SLE 13 | 1.69      | 12               | 5                 | +     | -   | +           | +         | -          | Plaq (200mg/d)                                |
| SLE 14 | 4.42      | 33               | 7                 | -     | -   | +           | +         | +          | Plaq (400mg/d), Pred (5mg/d)                  |
| SLE 15 | 7.88      | 23               | 9                 | +     | -   | +           | +         | +          | Pred (5mg/qod), Imuran (100mg/d)              |
| SLE 16 | 6.17      | 13               | 8                 | +     | -   | +           | +         | +          | Plaq (500mg/d), Pred (15mg/d), Cytosan (1g/d) |
| SLE 17 | 2.14      | 20               | 7                 | -     | -   | +           | +         | +          | Plaq (400mg/d), Dapsone (100mg/d)             |
| SLE 18 | 4.92      | 24               | 7                 | -     | -   | +           | -         | +          | Plaq (100mg/d)                                |
| SLE 19 | 12.12     | 28               | 6                 | -     | -   | +           | -         | +          | Pred (3mg/d), Imuran (150mg/d)                |
| SLE 20 | 6.66      | 22               | 6                 | -     | -   | -           | +         | +          | Plaq (400mg/d), Pred (7mg/d)                  |
| SLE 21 | 4.25      | 45               | 6                 | -     | -   | -           | +         | -          | Plaq (200mg/d)                                |
| SLE 22 | 1.28      | 49               | 5                 | -     | -   | -           | +         | -          | Plaq (400mg/d), Pred (4mg/d)                  |
| SLE 23 | 3.64      | 49               | 6                 | -     | -   | +           | +         | -          | Prednisone (15mg/d), Cellcept (20mg/d)        |
| SLE 24 | 3.64      | 17               | 8                 | +     | +   | +           | +         | +          | Pred (5mg/d), Cyclosporine (200mg/d)          |
| SLE 25 | 2.85      | 34               | 5                 | -     | -   | -           | +         | -          | Dapsone (100mg/d)                             |
| SLE 26 | 3.37      | 28               | 6                 | -     | +   | -           | +         | +          | Pred (9mg/d), Mtx (10mg/wk)                   |
| SLE 27 | 6.13      | 40               | 8                 | -     | +   | +           | +         | +          | Plaq, Pred, Mtx                               |
| SLE 28 | 2.16      | 20               | 7                 | +     | +   | -           | +         | -          | Pred (10mg/d), Imuran (100mg/d)               |
| SLE 29 | 3.55      | 54               | 6                 | +     | -   | +           | -         | -          | Plaq (400mg/d), Pred (5mg/d)                  |
| SLE 30 | 1.69      | 35               | 6                 | -     | -   | -           | +         | +          | --                                            |
| SLE 31 | 1.57      | 15               | 5                 | +     | -   | +           | +         | -          | --                                            |
| SLE 32 | 1.53      | 23               | 6                 | -     | -   | -           | -         | +          | --                                            |
| SLE 33 | 6.57      | 18               | 6                 | -     | -   | -           | +         | +          | Plaq (400mg/d), Pred                          |
| SLE 34 | 9.04      | 31               | 7                 | -     | +   | +           | +         | +          | --                                            |
| SLE 35 | 2.12      | 66               | 4                 | -     | -   | -           | -         | -          | Pred (1mg/d)                                  |
| SLE 36 | 1.23      | 25               | 7                 | -     | -   | -           | +         | +          | Plaq (400mg/d), Mtx (3mg/wk)                  |
| SLE 37 | 3.34      | 19               | 6                 | +     | -   | -           | +         | +          | Plaq (200mg/d), Pred (10mg/qod)               |
| SLE 38 | 7.34      | 8                | 6                 | +     | -   | +           | -         | -          | Pred (4mg/d), Mtx (16mg/wk)                   |
| SLE 39 | 8.17      | 16               | 9                 | +     | -   | +           | +         | +          | Pred (6mg/d), Mtx (10mg/wk)                   |
| SLE 40 | 1.75      | 17               | 8                 | -     | +   | -           | +         | +          | Plaq (400mg/d)                                |
| SLE 41 | 2.22      | 38               | 6                 | -     | -   | -           | +         | -          | Plaq (200mg/bid), Decadron (4mg/d)            |
| SLE 42 | 3.18      | 16               | 5                 | -     | -   | +           | -         | -          | Pred                                          |
| SLE 43 | 1.75      | 44               | 5                 | -     | -   | -           | -         | +          | Plaq (400mg/d)                                |
| SLE 44 | 5.63      | 31               | 7                 | -     | +   | +           | +         | -          | Pred (5mg/d), Imuran (100mg/d)                |
| SLE 45 | 1.41      | 46               | 7                 | -     | -   | -           | +         | +          | Plaq (400mg/d), Pred (5mg/d)                  |
| SLE 46 | 1.13      | 29               | 5                 | -     | -   | -           | +         | -          | Plaq (200mg/d)                                |
| SLE 47 | 1.43      | 16               | 6                 | -     | -   | -           | -         | -          | Plaq (500mg/d), Pred (5mg/d), 6MP (100mg/d)   |
| SLE 48 | 1.52      | 34               | 5                 | -     | -   | -           | +         | -          | Plaq (200mg/d)                                |

Abbreviations: Plaq, Plaquenil; Pred, Prednisone; Mtx, Methotrexate.
