# Supplementary material
Source: PubMed Central journal article supplement (PMC151388)
Supplement: pnas_0337679100_3.pdf [file pnas_0337679100_3.pdf]

Supporting information for Baechler *et al.* (2003) *Proc. Natl. Acad. Sci. USA*,  
10.1073/pnas.0337679100

**Table 4. Genes that best discriminate systemic lupus erythematosus from control peripheral blood mononuclear cells are enriched for IFN-regulated genes**



| Criteria Used to Define Genes as "IFN-Regulated"                  | Criteria Used to Define Genes as "Dysregulated in SLE"   | # of IFN-Regulated Transcripts Observed | # Expected by Chance Alone | Ratio: Observed/Expected | P value (Chi-Test)    |
|-------------------------------------------------------------------|----------------------------------------------------------|-----------------------------------------|----------------------------|--------------------------|-----------------------|
| Fold Change > 2,<br>AD Difference > 500,<br>4/4 Experiments (193) | p<0.001,<br>Fold Change > 1.5,<br>Difference > 100 (161) | 23 (14.3%)                              | 6.8 (4.2%)                 | 3.4                      | 1.0x10 <sup>-10</sup> |
|                                                                   | p<0.001,<br>Fold Change > 1.5,<br>Difference > 200 (141) | 22 (15.6%)                              | 6.0                        | 3.7                      | 9.9x10 <sup>-12</sup> |
|                                                                   | p<0.001,<br>Fold Change > 1.6,<br>Difference > 100 (130) | 22 (16.9%)                              | 5.5                        | 4.0                      | 2.9x10 <sup>-13</sup> |
|                                                                   | p<0.001 (465)                                            | 33 (7.1%)                               | 19.7                       | 1.7                      | 1.2x10 <sup>-3</sup>  |
| Fold Change > 2,<br>Difference > 500,<br>3/4 Experiments (551)    | p<0.001,<br>Fold Change > 1.5,<br>Difference > 100 (161) | 40 (24.8%)                              | 19.4 (12.1%)               | 2.1                      | 4.0x10 <sup>-7</sup>  |
|                                                                   | p<0.001,<br>Fold Change > 1.5,<br>Difference > 200 (141) | 38 (27.0%)                              | 17.0                       | 2.2                      | 3.6x10 <sup>-8</sup>  |
|                                                                   | p<0.001,<br>Fold Change > 1.6,<br>Difference > 100 (130) | 36 (27.7%)                              | 15.7                       | 2.3                      | 2.9x10 <sup>-8</sup>  |
|                                                                   | p<0.001 (465)                                            | 67 (14.4%)                              | 56.1                       | 1.2                      | 0.10                  |
| p<0.001 (63)                                                      | p<0.001,<br>Fold Change > 1.5,<br>Difference > 100 (161) | 9 (5.6%)                                | 2.2 (1.4%)                 | 4.1                      | 3.1x10 <sup>-6</sup>  |
|                                                                   | p<0.001,<br>Fold Change > 1.5,<br>Difference > 200 (141) | 9 (6.4%)                                | 1.9                        | 4.6                      | 2.3x10 <sup>-7</sup>  |
|                                                                   | p<0.001,<br>Fold Change > 1.6,<br>Difference > 100 (130) | 7 (5.4%)                                | 1.8                        | 3.9                      | 7.1x10 <sup>-5</sup>  |
|                                                                   | p<0.001 (465)                                            | 16 (3.4%)                               | 6.4                        | 2.5                      | 5.8x10 <sup>-5</sup>  |
| p<0.005 (225)                                                     | p<0.001,<br>Fold Change > 1.5,<br>Difference > 100 (161) | 16 (9.9%)                               | 7.9 (4.9%)                 | 2.0                      | 2.8x10 <sup>-3</sup>  |
|                                                                   | p<0.001,<br>Fold Change > 1.5,<br>Difference > 200 (141) | 16 (11.3%)                              | 6.9                        | 2.3                      | 3.5x10 <sup>-4</sup>  |
|                                                                   | p<0.001,<br>Fold Change > 1.6,<br>Difference > 100 (130) | 14 (10.8%)                              | 6.4                        | 2.2                      | 1.8x10 <sup>-3</sup>  |
|                                                                   | p<0.001 (465)                                            | 40 (8.6%)                               | 22.9                       | 1.7                      | 1.1x10 <sup>-4</sup>  |
| p<0.01 (365)                                                      | p<0.001,<br>Fold Change > 1.5,<br>Difference > 100 (161) | 24 (14.9%)                              | 12.9 (8.0%)                | 1.9                      | 9.9x10 <sup>-4</sup>  |
|                                                                   | p<0.001,<br>Fold Change > 1.5,<br>Difference > 200 (141) | 24 (17.0%)                              | 11.3                       | 2.1                      | 5.9x10 <sup>-5</sup>  |
|                                                                   | p<0.001,<br>Fold Change > 1.6,<br>Difference > 100 (130) | 22 (16.9%)                              | 10.4                       | 2.1                      | 1.4x10 <sup>-4</sup>  |
|                                                                   | p<0.001 (465)                                            | 62 (13.3%)                              | 37.2                       | 1.7                      | 7.5x10 <sup>-6</sup>  |
