# Supplementary material
Source: PubMed Central journal article supplement (PMC151388)
Supplement: pnas_0337679100_4.pdf [file pnas_0337679100_4.pdf]

Supporting information for Baechler *et al.* (2003) *Proc. Natl. Acad. Sci. USA*,  
10.1073/pnas.0337679100

**Table 5. Gene expression data for the IFNs and IFN receptors**

| Probe Set | Identifier | Gene                                          | SLE         | Control     | <i>P</i> value |
|-----------|------------|-----------------------------------------------|-------------|-------------|----------------|
| 1021_at   | J00219     | interferon, gamma                             | 342 ± 506   | 215 ± 301   | 0.146          |
| 1611_s_at | J00219     | interferon, gamma                             | 119 ± 138   | 116 ± 136   | 0.900          |
| 40702_at  | X13274     | interferon, gamma                             | 226 ± 417   | 167 ± 302   | 0.445          |
| 1038_s_at | U19247     | interferon gamma receptor 1                   | 8933 ± 3803 | 6771 ± 1759 | 0.001          |
| 41140_at  | U05875     | interferon gamma receptor 2                   | 9909 ± 3363 | 8539 ± 1700 | 0.015          |
| 1770_at   | J00207     | interferon, alpha 2                           | 22 ± 13     | 22 ± 10     | 1.000          |
| 1791_s_at | J00207     | interferon, alpha 2                           | 20 ± 0      | 33 ± 52     | 0.112          |
| 1580_f_at | M27318     | interferon, alpha 4                           | 20 ± 0      | 20 ± 0      | --             |
| 1540_f_at | X02956     | interferon, alpha 5                           | 21 ± 7      | 23 ± 22     | 0.488          |
| 32415_at  | V00541     | interferon, alpha 5                           | 23 ± 18     | 20 ± 0      | 0.188          |
| 1541_f_at | X02958     | interferon, alpha 6                           | 37 ± 69     | 24 ± 24     | 0.203          |
| 682_at    | K01900     | interferon, alpha 8                           | 26 ± 23     | 21 ± 6      | 0.122          |
| 427_f_at  | V00551     | interferon, alpha 10                          | 28 ± 34     | 21 ± 5      | 0.134          |
| 1022_f_at | V00542     | interferon, alpha 14                          | 20 ± 0      | 29 ± 38     | 0.132          |
| 1075_f_at | M28585     | interferon, alpha 16                          | 51 ± 90     | 42 ± 57     | 0.607          |
| 1435_f_at | V00540     | interferon, alpha 21                          | 20 ± 0      | 20 ± 0      | --             |
| 1214_s_at | V00535     | interferon, beta 1, fibroblast                | 20 ± 0      | 20 ± 0      | --             |
| 38299_at  | X04430     | interleukin 6 (interferon, beta 2)            | 459 ± 764   | 74 ± 170    | 0.001          |
| 1666_at   | J00210     | interferon, type 1, cluster                   | 39 ± 47     | 23 ± 16     | 0.033          |
| 33969_at  | X58822     | interferon, omega 1                           | 63 ± 61     | 44 ± 52     | 0.120          |
| 1157_s_at | J03171     | interferon (alpha, beta and omega) receptor 1 | 168 ± 160   | 155 ± 158   | 0.698          |
| 1568_s_at | L42243     | interferon (alpha, beta and omega) receptor 2 | 839 ± 276   | 862 ± 269   | 0.688          |
| 1569_r_at | L42243     | interferon (alpha, beta and omega) receptor 2 | 860 ± 485   | 926 ± 447   | 0.507          |
| 1588_at   | L42243     | interferon (alpha, beta and omega) receptor 2 | 392 ± 250   | 505 ± 280   | 0.047          |
| 1589_s_at | L42243     | interferon (alpha, beta and omega) receptor 2 | 1990 ± 1014 | 1593 ± 655  | 0.029          |
