# Supplementary material
Source: PubMed Central journal article supplement (PMC151388)
Supplement: pnas_0337679100_5.pdf [file pnas_0337679100_5.pdf]

**Table 6. Calculating interferon scores by using multiple methods**

| Sample | Summation | Euc. D. vs. mean | Euc. D. vs. median | Subtract mean | Subtract median | Ratio vs. mean | Ratio vs. median |
|--------|-----------|------------------|--------------------|---------------|-----------------|----------------|------------------|
| SLE 1  | 1.2       | 0.16             | 0.16               | 0.5           | 0.5             | 18.3           | 21.8             |
| SLE 2  | 5.9       | 1.28             | 1.32               | 4.4           | 4.5             | 29.3           | 37.0             |
| SLE 3  | 8.4       | 2.05             | 2.09               | 6.9           | 7.1             | 36.3           | 44.1             |
| SLE 4  | 1.5       | 0.22             | 0.22               | 0.7           | 0.6             | 15.0           | 18.8             |
| SLE 5  | 2.6       | 0.37             | 0.41               | 1.1           | 1.3             | 12.1           | 19.7             |
| SLE 6  | 3.1       | 0.53             | 0.57               | 1.6           | 1.8             | 16.6           | 24.3             |
| SLE 7  | 2.1       | 0.33             | 0.36               | 1.0           | 1.0             | 12.7           | 18.3             |
| SLE 8  | 1.6       | 0.17             | 0.20               | 0.5           | 0.5             | 6.6            | 12.4             |
| SLE 9  | 1.7       | 0.22             | 0.24               | 0.5           | 0.6             | 7.2            | 12.0             |
| SLE 10 | 3.3       | 0.57             | 0.61               | 1.8           | 2.0             | 16.4           | 24.1             |
| SLE 11 | 1.9       | 0.47             | 0.49               | 1.1           | 1.2             | 18.4           | 22.8             |
| SLE 12 | 5.0       | 1.09             | 1.13               | 3.5           | 3.7             | 24.2           | 31.9             |
| SLE 13 | 1.7       | 0.19             | 0.21               | 0.5           | 0.5             | 11.6           | 7.6              |
| SLE 14 | 4.4       | 0.89             | 0.93               | 2.9           | 3.1             | 21.8           | 29.5             |
| SLE 15 | 7.9       | 1.89             | 1.94               | 6.4           | 6.5             | 34.8           | 42.5             |
| SLE 16 | 6.2       | 1.49             | 1.53               | 4.7           | 4.8             | 28.2           | 35.9             |
| SLE 17 | 2.1       | 0.49             | 0.50               | 1.4           | 1.3             | 22.0           | 16.3             |
| SLE 18 | 4.9       | 1.08             | 1.13               | 3.4           | 3.6             | 24.6           | 32.3             |
| SLE 19 | 12.1      | 2.94             | 2.99               | 10.6          | 10.8            | 44.7           | 52.4             |
| SLE 20 | 6.7       | 1.54             | 1.59               | 5.1           | 5.3             | 30.6           | 38.3             |
| SLE 21 | 4.3       | 0.86             | 0.91               | 2.8           | 3.0             | 26.9           | 34.1             |
| SLE 22 | 1.3       | 0.36             | 0.35               | 1.0           | 0.8             | 37.2           | 30.1             |
| SLE 23 | 3.6       | 0.66             | 0.71               | 2.1           | 2.3             | 17.6           | 25.3             |
| SLE 24 | 3.6       | 0.72             | 0.76               | 2.1           | 2.3             | 17.9           | 25.7             |
| SLE 25 | 2.8       | 0.43             | 0.48               | 1.4           | 1.5             | 14.8           | 22.3             |
| SLE 26 | 3.4       | 0.61             | 0.65               | 1.9           | 2.0             | 16.6           | 23.8             |
| SLE 27 | 6.1       | 1.36             | 1.41               | 4.6           | 4.8             | 29.9           | 37.6             |
| SLE 28 | 2.2       | 0.34             | 0.36               | 0.9           | 1.0             | 20.3           | 16.1             |
| SLE 29 | 3.6       | 0.75             | 0.79               | 2.3           | 2.4             | 24.0           | 30.2             |
| SLE 30 | 1.7       | 0.20             | 0.23               | 0.6           | 0.6             | 19.1           | 15.4             |
| SLE 31 | 1.6       | 0.36             | 0.36               | 1.1           | 1.0             | 26.5           | 20.8             |
| SLE 32 | 1.5       | 0.33             | 0.32               | 0.8           | 0.8             | 19.1           | 13.9             |
| SLE 33 | 6.6       | 1.65             | 1.70               | 5.2           | 5.3             | 30.3           | 37.5             |
| SLE 34 | 9.0       | 2.27             | 2.32               | 7.7           | 7.8             | 37.8           | 45.3             |
| SLE 35 | 2.1       | 0.60             | 0.64               | 1.5           | 1.5             | 31.8           | 35.2             |
| SLE 36 | 1.2       | 0.23             | 0.21               | 0.8           | 0.6             | 18.1           | 11.5             |
| SLE 37 | 3.3       | 0.60             | 0.65               | 1.9           | 2.0             | 16.9           | 24.1             |
| SLE 38 | 7.3       | 1.72             | 1.77               | 5.8           | 6.0             | 33.4           | 41.1             |
| SLE 39 | 8.2       | 2.09             | 2.13               | 6.7           | 6.8             | 34.3           | 42.0             |
| SLE 40 | 1.8       | 0.40             | 0.41               | 1.1           | 1.1             | 17.1           | 20.9             |
| SLE 41 | 2.2       | 0.42             | 0.46               | 1.1           | 1.1             | 13.0           | 16.5             |
| SLE 42 | 3.2       | 0.65             | 0.68               | 2.0           | 2.1             | 20.7           | 26.5             |
| SLE 43 | 1.7       | 0.42             | 0.43               | 1.1           | 1.2             | 20.1           | 24.6             |
| SLE 44 | 5.6       | 1.18             | 1.23               | 4.1           | 4.3             | 28.4           | 36.2             |
| SLE 45 | 1.4       | 0.29             | 0.28               | 0.7           | 0.6             | 19.5           | 12.2             |
| SLE 46 | 1.1       | 0.31             | 0.30               | 0.9           | 0.8             | 34.9           | 29.1             |
| SLE 47 | 1.4       | 0.24             | 0.24               | 0.6           | 0.5             | 13.1           | 8.3              |
| SLE 48 | 1.5       | 0.24             | 0.25               | 0.7           | 0.6             | 15.0           | 9.8              |
