# Supplementary material
Source: PubMed Central journal article supplement (PMC151388)
Supplement: pnas_0337679100_6.pdf [file pnas_0337679100_6.pdf]

Supporting information for Baechler *et al.* (2003) *Proc. Natl. Acad. Sci. USA*,  
10.1073/pnas.0337679100

**Table 7. Comparison of clinical features between IFN-high and IFN-low patients**

|                              | Summation           | Euclidean distance  | Subtract<br>mean/median | Ratio vs. mean      | Ratio<br>vs. median |
|------------------------------|---------------------|---------------------|-------------------------|---------------------|---------------------|
| Age at<br>diagnosis<br>(yrs) | IFN-high 25.2±12.2  | IFN-high 27.2±14.6  | IFN-high 25.2±12.2      | IFN-high 27.5±14.5  | IFN-high 29.8±15.1  |
|                              | IFN-low 30.0±13.3   | IFN-low 28.0±11.1   | IFN-low 30.0±13.3       | IFN-low 27.8±11.3   | IFN-low 25.5±10.0   |
|                              | <i>t</i> test 0.192 | <i>t</i> test 0.817 | <i>t</i> test 0.192     | <i>t</i> test 0.938 | <i>t</i> test 0.252 |
| # Criteria                   | IFN-high 6.8±1.2    | IFN-high 6.8±1.3    | IFN-high 6.8±1.2        | IFN-high 6.6±1.4    | IFN-high 6.6±1.4    |
|                              | IFN-low 5.7±1.1     | IFN-low 5.7±1.1     | IFN-low 5.7±1.1         | IFN-low 5.8±1.1     | IFN-low 5.8±1.0     |
|                              | <i>t</i> test 0.002 | <i>t</i> test 0.004 | <i>t</i> test 0.002     | <i>t</i> test 0.032 | <i>t</i> test 0.032 |
| % Renal/<br>CNS              | IFN-high 62.5%      | IFN-high 58.3%      | IFN-high 62.5%          | IFN-high 54.2%      | IFN-high 50.0%      |
|                              | IFN-low 20.8%       | IFN-low 25.0%       | IFN-low 20.8%           | IFN-low 29.2%       | IFN-low 33.3%       |
|                              | Chi-square 7.7E-06  | Chi-square 0.001    | Chi-square 7.7E-06      | Chi-square 0.023    | Chi-square 0.160    |
| % Hematologic                | IFN-high 75.0%      | IFN-high 70.8%      | IFN-high 75.0%          | IFN-high 70.8%      | IFN-high 70.8%      |
|                              | IFN-low 20.8%       | IFN-low 25.0%       | IFN-low 20.8%           | IFN-low 25.0%       | IFN-low 25.0%       |
|                              | Chi-square 6.1E-09  | Chi-square 7.1E-06  | Chi-square 6.1E-09      | Chi-square 7.1E-06  | Chi-square 7.1E-06  |
| Serositis                    | IFN-high 66.7%      | IFN-high 66.7%      | IFN-high 66.7%          | IFN-high 66.7%      | IFN-high 62.5%      |
|                              | IFN-low 75.0%       | IFN-low 75.0%       | IFN-low 75.0%           | IFN-low 75.0%       | IFN-low 79.2%       |
|                              | Chi-square 0.637    | Chi-square 0.637    | Chi-square 0.637        | Chi-square 0.637    | Chi-square 0.359    |
