# Supplementary material
Source: PubMed Central journal article supplement (PMC151388)
Supplement: pnas_0337679100_7.pdf [file pnas_0337679100_7.pdf]

Supporting information for Baechler *et al.* (2003) *Proc. Natl. Acad. Sci. USA*,  
10.1073/pnas.0337679100

**Table 8. Comparing IFN scores within clinical subsets**



Renal/CNS (20+, 28-)

|                | Summation | Euc. D. (Mean) | Euc. D. (Median) | Subtract mean | Subtract median | Ratio vs. mean | Ratio vs. median |
|----------------|-----------|----------------|------------------|---------------|-----------------|----------------|------------------|
| Positive       | 4.8±2.5   | 1.06±0.67      | 1.10±0.68        | 3.5±2.3       | 3.6±2.4         | 24.8±8.3       | 30.3±10.6        |
| Negative       | 2.9±2.4   | 0.61±0.60      | 0.63±0.61        | 1.9±2.1       | 1.9±2.2         | 21.1±8.9       | 23.3±10.5        |
| <i>P</i> value | 0.010     | 0.019          | 0.018            | 0.021         | 0.017           | 0.139          | 0.027            |

Renal (15+, 33-)

|                | Summation | Euc. D. (Mean) | Euc. D. (Median) | Subtract mean | Subtract median | Ratio vs. mean | Ratio vs. median |
|----------------|-----------|----------------|------------------|---------------|-----------------|----------------|------------------|
| Positive       | 4.7±2.4   | 1.03±0.67      | 1.07±0.68        | 3.3±2.3       | 3.5±2.3         | 24.4±8.3       | 29.5±11.0        |
| Negative       | 3.3±2.5   | 0.69±0.64      | 0.72±0.65        | 2.2±2.3       | 2.2±2.3         | 21.8±8.9       | 24.7±10.8        |
| <i>P</i> value | 0.071     | 0.111          | 0.105            | 0.121         | 0.106           | 0.330          | 0.168            |

CNS (7+, 41-)

|                | Summation | Euc. D. (Mean) | Euc. D. (Median) | Subtract mean | Subtract median | Ratio vs. mean | Ratio vs. median |
|----------------|-----------|----------------|------------------|---------------|-----------------|----------------|------------------|
| Positive       | 4.5±2.6   | 0.98±0.68      | 1.02±0.70        | 3.2±2.4       | 3.3±2.5         | 24.0±8.1       | 29.4±10.5        |
| Negative       | 3.6±2.6   | 0.77±0.66      | 0.79±0.68        | 2.4±2.3       | 2.5±2.4         | 22.4±8.9       | 25.7±11.1        |
| <i>P</i> value | 0.384     | 0.457          | 0.445            | 0.450         | 0.430           | 0.638          | 0.417            |

Hematologic (23+, 25-)

|                | Summation | Euc. D. (Mean) | Euc. D. (Median) | Subtract mean | Subtract median | Ratio vs. mean | Ratio vs. median |
|----------------|-----------|----------------|------------------|---------------|-----------------|----------------|------------------|
| Positive       | 5.1±2.8   | 1.15±0.73      | 1.18±0.74        | 3.8±2.6       | 3.9±2.7         | 25.7±8.9       | 31.3±11.2        |
| Negative       | 2.4±1.5   | 0.48±0.38      | 0.50±0.39        | 1.4±1.2       | 1.5±1.3         | 19.8±7.8       | 21.6±8.7         |
| <i>P</i> value | 0.0003    | 0.0004         | 0.0004           | 0.0005        | 0.0004          | 0.0202         | 0.0017           |

# major criteria (1 patient with three major criteria, 15 with two, 12 with one, 20 with none)

|                       | Summation | Euc. D. (Mean) | Euc. D. (Median) | Subtract mean | Subtract median | Ratio vs. mean | Ratio vs. median |
|-----------------------|-----------|----------------|------------------|---------------|-----------------|----------------|------------------|
| 0                     | 2.4±1.6   | 0.48±0.42      | 0.50±0.43        | 1.4±1.4       | 1.4±1.5         | 20.6±8.4       | 21.7±9.6         |
| 1                     | 3.8±2.8   | 0.78±0.72      | 0.82±0.73        | 2.5±2.7       | 2.6±2.7         | 20.0±9.1       | 25.5±10.1        |
| 2,3                   | 5.3±2.5   | 1.21±0.68      | 1.24±0.69        | 4.0±2.3       | 4.1±2.4         | 27.1±7.6       | 32.4±10.9        |
| 1,2,3                 | 4.7±2.7   | 1.024±0.715    | 1.060±0.724      | 3.3±2.5       | 3.5±2.6         | 24.0±8.8       | 29.4±10.9        |
| <i>P</i> (0 vs 1)     | 0.140     | 0.201          | 0.187            | 0.216         | 0.191           | 0.841          | 0.312            |
| <i>P</i> (0 vs 2/3)   | 0.0004    | 0.0010         | 0.0009           | 0.0008        | 0.0007          | 0.0211         | 0.0044           |
| <i>P</i> (1 vs 2/3)   | 0.138     | 0.126          | 0.127            | 0.148         | 0.146           | 0.039          | 0.095            |
| <i>P</i> (0 vs 1,2,3) | 0.0007    | 0.0018         | 0.0016           | 0.0018        | 0.0014          | 0.1819         | 0.0132           |

Serositis (34+, 14-)

|                | Summation | Euc. D. (Mean) | Euc. D. (Median) | Subtract mean | Subtract median | Ratio vs. mean | Ratio vs. median |
|----------------|-----------|----------------|------------------|---------------|-----------------|----------------|------------------|
| Positive       | 3.5±2.3   | 0.74±0.59      | 0.77±0.60        | 2.3±2.0       | 2.4±2.1         | 22.3±7.8       | 25.4±10.0        |
| Negative       | 4.2±3.2   | 0.92±0.81      | 0.95±0.82        | 3.0±3.0       | 3.1±3.0         | 23.4±11.0      | 28.2±13.3        |
| <i>P</i> value | 0.475     | 0.456          | 0.455            | 0.460         | 0.460           | 0.738          | 0.494            |
