# Supplementary material
Source: PubMed Central journal article supplement (PMC151388)
Supplement: pnas_0337679100_8.pdf [file pnas_0337679100_8.pdf]

**Table 9. Correlation coefficients of clinical features with IFN scores**

|                    | Summation                   | Euc. D.<br>vs. mean | Euc. D. vs.<br>median | Subtract<br>mean | Subtract<br>median | Ratio<br>vs. mean | Ratio vs.<br>median |
|--------------------|-----------------------------|---------------------|-----------------------|------------------|--------------------|-------------------|---------------------|
| # SLE criteria     | 0.51 (0.00024) <sup>a</sup> | 0.52 (0.00017)      | 0.52 (0.00018)        | 0.50 (0.00031)   | 0.50 (0.00030)     | 0.35 (0.016)      | 0.39 (0.0062)       |
| Renal              | 0.26 (0.070)                | 0.24 (0.099)        | 0.24 (0.094)          | 0.23 (0.116)     | 0.24 (0.102)       | 0.14 (0.340)      | 0.21 (0.162)        |
| CNS                | 0.13 (0.363)                | 0.12 (0.427)        | 0.12 (0.417)          | 0.12 (0.416)     | 0.12 (0.399)       | 0.07 (0.651)      | 0.12 (0.417)        |
| Renal and/or CNS   | 0.37 (0.009)                | 0.34 (0.016)        | 0.35 (0.015)          | 0.34 (0.018)     | 0.35 (0.015)       | 0.21 (0.144)      | 0.32 (0.026)        |
| Hematologic        | 0.53 (0.00012)              | 0.51 (0.00021)      | 0.51 (0.00019)        | 0.51 (0.00023)   | 0.51 (0.00019)     | 0.34 (0.019)      | 0.45 (0.00148)      |
| Serositis          | -0.12 (0.404)               | -0.13 (0.390)       | -0.13 (0.390)         | -0.13 (0.379)    | -0.13 (0.382)      | -0.06 (0.698)     | -0.11 (0.436)       |
| anti-dsDNA         | 0.35 (0.014)                | 0.35 (0.014)        | 0.35 (0.015)          | 0.35 (0.016)     | 0.35 (0.016)       | 0.10 (0.489)      | 0.19 (0.194)        |
| Age at diagnosis   | -0.22 (0.138)               | -0.19 (0.205)       | -0.18 (0.209)         | -0.19 (0.189)    | -0.20 (0.184)      | 0.07 (0.641)      | 0.02 (0.916)        |
| 0 major criteria   | -0.44 (0.002)               | -0.41 (0.004)       | -0.42 (0.003)         | -0.41 (0.004)    | -0.42 (0.003)      | -0.19 (0.185)     | -0.35 (0.015)       |
| 1 major criteria   | 0.01 (0.934)                | -0.01 (0.927)       | -0.01 (0.952)         | -0.01 (0.953)    | 0.00 (0.987)       | -0.18 (0.230)     | -0.04 (0.789)       |
| 2/3 major criteria | 0.45 (0.0012)               | 0.44 (0.0017)       | 0.44 (0.0016)         | 0.44 (0.0020)    | 0.44 (0.0017)      | 0.37 (0.0106)     | 0.40 (0.0047)       |

<sup>a</sup>Data are expressed as *r* values followed by *P* values from linear regression.
